# Supplementary material for: Rapid spatially-resolved post-synthetic patterning of metal–organic framework films
Source: Royal Society of Chemistry journal article supplement (doi:10.1039/d1cc01349a), 2021-01-01
Supplement: d1cc01349a1.pdf [file d1cc01349a1.pdf]

## Supplementary Information

# Rapid Spatially-Resolved Post-Synthetic Patterning of Metal-Organic Framework films

Fatimah Al-Ghazzawi,<sup>a,b,c</sup> Luke Conte,<sup>d</sup> Klaudia Wagner,<sup>a,b</sup> Christopher Richardson<sup>\*d</sup> and Pawel Wagner<sup>\*a,b</sup>

<sup>a</sup> ARC Centre of Excellence for Electromaterials Science, AIIIM Faculty, Innovation Campus, University of Wollongong, North Wollongong, NSW 2522, Australia.

<sup>b</sup> Intelligent Polymer Research Institute, AIIIM Faculty, Innovation Campus, University of Wollongong, North Wollongong, NSW 2522, Australia.

<sup>c</sup> Al-Nasiriyah Technical Institute, Southern Technical University, 64001, Thi-Qar, Iraq.

<sup>d</sup> School of Chemistry and Molecular Bioscience, Faculty of Science Medicine and Health, University of Wollongong, NSW 2522, Australia.

## Table of Contents

|     |                                                                                    |    |
|-----|------------------------------------------------------------------------------------|----|
| 1   | General experimental .....                                                         | 2  |
| 2   | Preparative chemistry .....                                                        | 3  |
| 2.1 | Preparation of UiO-66-NH <sub>2</sub> films.....                                   | 3  |
| 2.2 | Preparation of UiO-66-N=CHFc( <i>p</i> -46) .....                                  | 3  |
| 3   | PXRD Patterns .....                                                                | 3  |
| 4   | Images .....                                                                       | 4  |
| 5   | SEM-EDS area scans of films .....                                                  | 8  |
| 5.1 | UiO-66-NH <sub>2</sub> .....                                                       | 9  |
| 5.2 | UiO-66-NH=CHFc printed at ink temperature 25 °C; time before analysis 1 day.....   | 10 |
| 5.3 | UiO-66-NH=CHFc printed at ink temperature 25 °C; time before analysis 2 days. .... | 11 |
| 5.4 | UiO-66-NH=CHFc printed at ink temperature 70 °C; time before analysis 1 day.....   | 12 |
| 6   | SEM-EDS analyses of film cross sections.....                                       | 13 |
| 6.1 | UiO-66-NH=CHFc printed at ink temperature 25 °C; time before analysis 1 day.....   | 13 |
| 6.2 | UiO-66-NH=CHFc printed at ink temperature 70 °C; time before analysis 0 day.....   | 14 |
| 6.3 | UiO-66-NH=CHFc printed at ink temperature 70 °C; time before analysis 1 day.....   | 15 |
|     | Inductively Coupled Plasma-Mass Spectrometry .....                                 | 16 |
| 7   | Thermogravimetric-differential scanning calorimetry.....                           | 17 |
| 8   | Gas adsorption .....                                                               | 18 |

## 1 General experimental

All chemicals used were of analytical grade and purchased from either Sigma Aldrich, VWR Australia or Ajax Finechem Pty Ltd. Films of UiO-66-NH<sub>2</sub> were prepared following the method described by Li et al.<sup>1</sup>

Inkjet printing was performed using a PixDro LP50 piezo-controlled drop-on-demand printer with a single printhead. The printhead was assembled with the ink bottle connected to the pressure tube and voltage cable and computer controlled. The substrate stage was moved only in the XY domain at 200 mm/s during printing. Patterns were printed using a 128 nozzle printhead (Type SE 128 AA) with nozzle spacing of 502 microns and nozzle diameter 35 microns. When one nozzle was selected for printing, the efficiency was checked by the drop-watcher camera. The pressure and voltage of inks were 18-21 mbar and 58-60 V, respectively. The ejection speed and drop size from the nozzle were  $0.76 \pm 0.1$  m/s and  $30 \pm 1.8$  pL, respectively. After every 10 layers, the active nozzle was checked for blockage. After completing the pattern, the film samples were washed two times using the print solvent, two times with EtOH and multiple times with acetone. The ink was prepared by dissolving ferrocene carboxaldehyde (214 mg, 1 mmol) in 10 mL of 1,4-dioxane. After storage for 24 h, the ink was filtered ( $45 \mu\text{m}$ ) to remove any particles that may lead to blocking the printhead.

Leica M205A and Leica DM6000 microscopes fitted with CCD cameras were used to obtain images of the morphology of the samples and resolution of the patterns. The Leica M205A was used at scales from 10 mm to 1 mm and the Leica DM6000 at scales from  $500 \mu\text{m}$  to  $25 \mu\text{m}$ .

A JEOL JSM-7500 was used to study morphologies of all the samples at 15 kV. Energy-Dispersive X-Ray Spectroscopy (EDS) data was recorded on a JEOL JSM-6490LV at 15 kV accelerating voltage. Samples were prepared by attaching the printed material onto a copper heel by a conductive carbon tape and silver paint. Samples for imaging were coated by thin platinum layer. Samples for EDS analysis were not coated.

TG-DSC traces were obtained using a NETZSCH STA 449 F3 Jupiter simultaneous thermogravimetric and differential scanning calorimeter. Data was processed using NETZSCH Proteus Thermal Analyser software, version 6.1.0. Traces were recorded by placing the sample ( $\sim 5$ -10 mg) in a Pt pan and subjecting the material to the specified heating protocols reported. This was usually 35-1000 °C at 10 °C/min under a flow of O<sub>2</sub>/N<sub>2</sub> (20:80) of 20 cm<sup>3</sup>/min.

Powder X-ray diffraction (PXRD) patterns were recorded on a GBC-MMA X-ray diffractometer with samples mounted on the borosilicate glass substrate  $2\theta$  angle range of 5°-45° in  $2\theta$  with a step size of 0.05° at 1° per minute.

Gas adsorption studies were carried out at the Wollongong Isotope and Geochronology Laboratory using a Quantachrome Autosorb MP instrument and high purity nitrogen (99.999 %) gas. Surface areas were determined using Brunauer-Emmett-Teller (BET) calculations.

ICP-MS was performed at the University of Sydney by Dr Nicholas Proschogo on a PerkinElmer NexION 2000B Inductively Coupled Plasma-Mass Spectrometer. Samples were digested in trace metal free concentrated HF ( $\sim 200 \mu\text{L}$  for  $\sim 2$  mg samples). The samples were centrifuged and  $40 \mu\text{L}$  of the supernatant taken, diluted to a volume of 10 mL in 0.4 M trace metal free HNO<sub>3</sub> and subjected to analysis in triplicate.

The electrochemical measurements were acquired using a CHI instrument, model 660D, and data was analysed using CHI software. For cyclic voltammetry the potential was applied in positive direction at a scan rate 50 mV/s between 0 and 1.3 V. The working electrode was FTO coated glass with or without UiO-66-NH<sub>2</sub> and UiO-66-N=CHFc films. The counter electrode was Pt mesh. The reference electrode was Ag/Ag<sup>+</sup> (silver wire and 0.005 M AgNO<sub>3</sub> in 0.1 M tetrabutylammonium perchlorate in dry acetonitrile) and the measurements were performed in dry acetonitrile containing 0.1 M LiClO<sub>4</sub> as an electrolyte.

---

<sup>1</sup> J. Li, F. Wu, L. Lin, Y. Guo, H. Liu and X. Zhang, *Chem. Eng. J.*, 2018, **333**, 146-152.

## 2 Preparative chemistry

### 2.1 Preparation of UiO-66-NH<sub>2</sub> films

A typical preparation consisted of immersing a section of an O<sub>2</sub> plasma treated glass slide in a vial containing 139 mg of ZrCl<sub>4</sub> (0.5 mmol) and 108 mg of 2-aminoterephthalic acid (0.5 mmol) dissolved in 10 mL of DMF, 1 mL of acetic acid and 0.2 mL of H<sub>2</sub>O. The vial was capped and heated in the oven at 120 °C for 24 h. After cooling, the glass slide coated with UiO-66-NH<sub>2</sub> was removed and washed twice with fresh DMF and multiple times with EtOH.

### 2.2 Preparation of UiO-66-N=CHFc(*p*-46)

Ferrocene carboxaldehyde (536 mg, 2.5 mmol) was dissolved in 25 mL of 1,4 dioxane to give a 0.1 M solution and added to UiO-66-NH<sub>2</sub> (250 mg, 0.14 mmol\*). The reaction solution was heated at 70 °C overnight. The dark brown crystals of PSM-UiO-66-N=CHFc(*p*-46) were recovered by centrifugation and washed with fresh 1,4-dioxane solution (three times) and CH<sub>2</sub>Cl<sub>2</sub> (three times). The supernatant DCM solution was colourless indicating no leaching of ferrocene species into solution. The mass recovery was essentially quantitative.

\*Based on the formula Zr<sub>6</sub>O<sub>4</sub>(OH)<sub>4</sub>(O<sub>2</sub>C-C<sub>6</sub>H<sub>3</sub>NH<sub>2</sub>-CO<sub>2</sub>)<sub>6</sub> (1754.09 g·mol<sup>-1</sup>).

## 3 PXRD Patterns

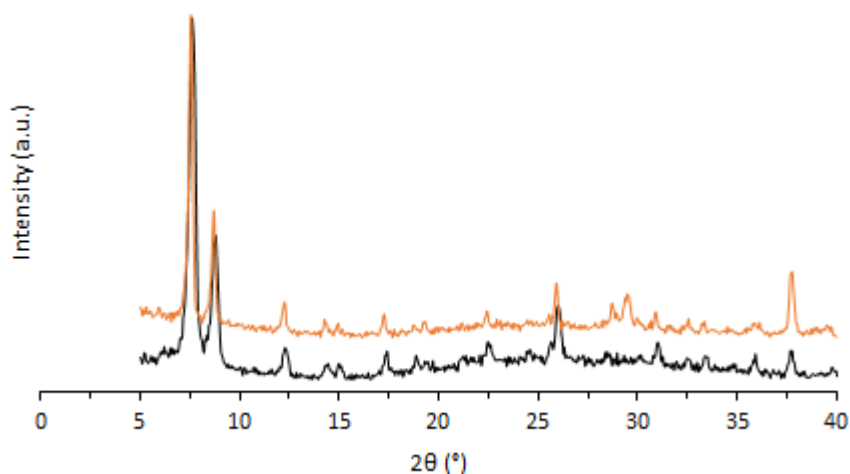

**Figure S 1** PXRD patterns of UiO-66-NH<sub>2</sub> film on a glass slide (black) and UiO-66-N=CHFc(*f*-8) (orange). No background subtraction has been performed.

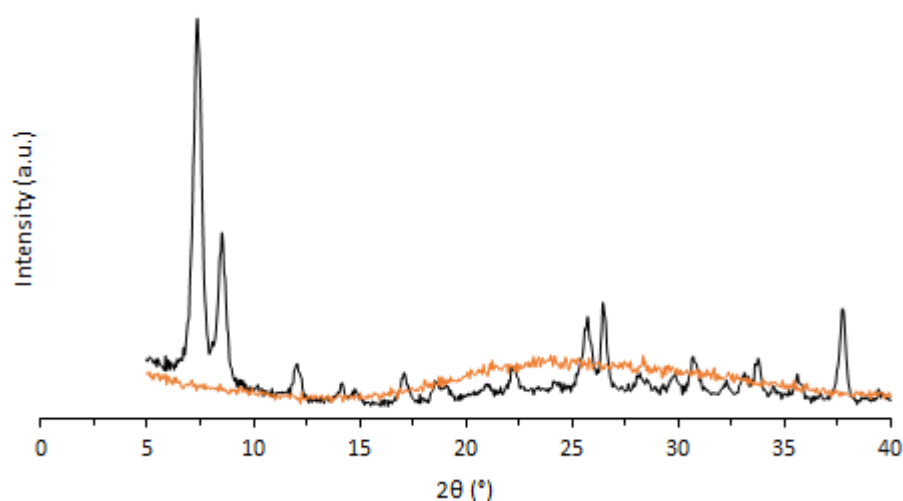

**Figure S 2** PXRD patterns of UiO-66-NH<sub>2</sub> film grown on FTO (black) and a trace of the FTO substrate (orange). No background subtraction has been performed.

## 4 Images

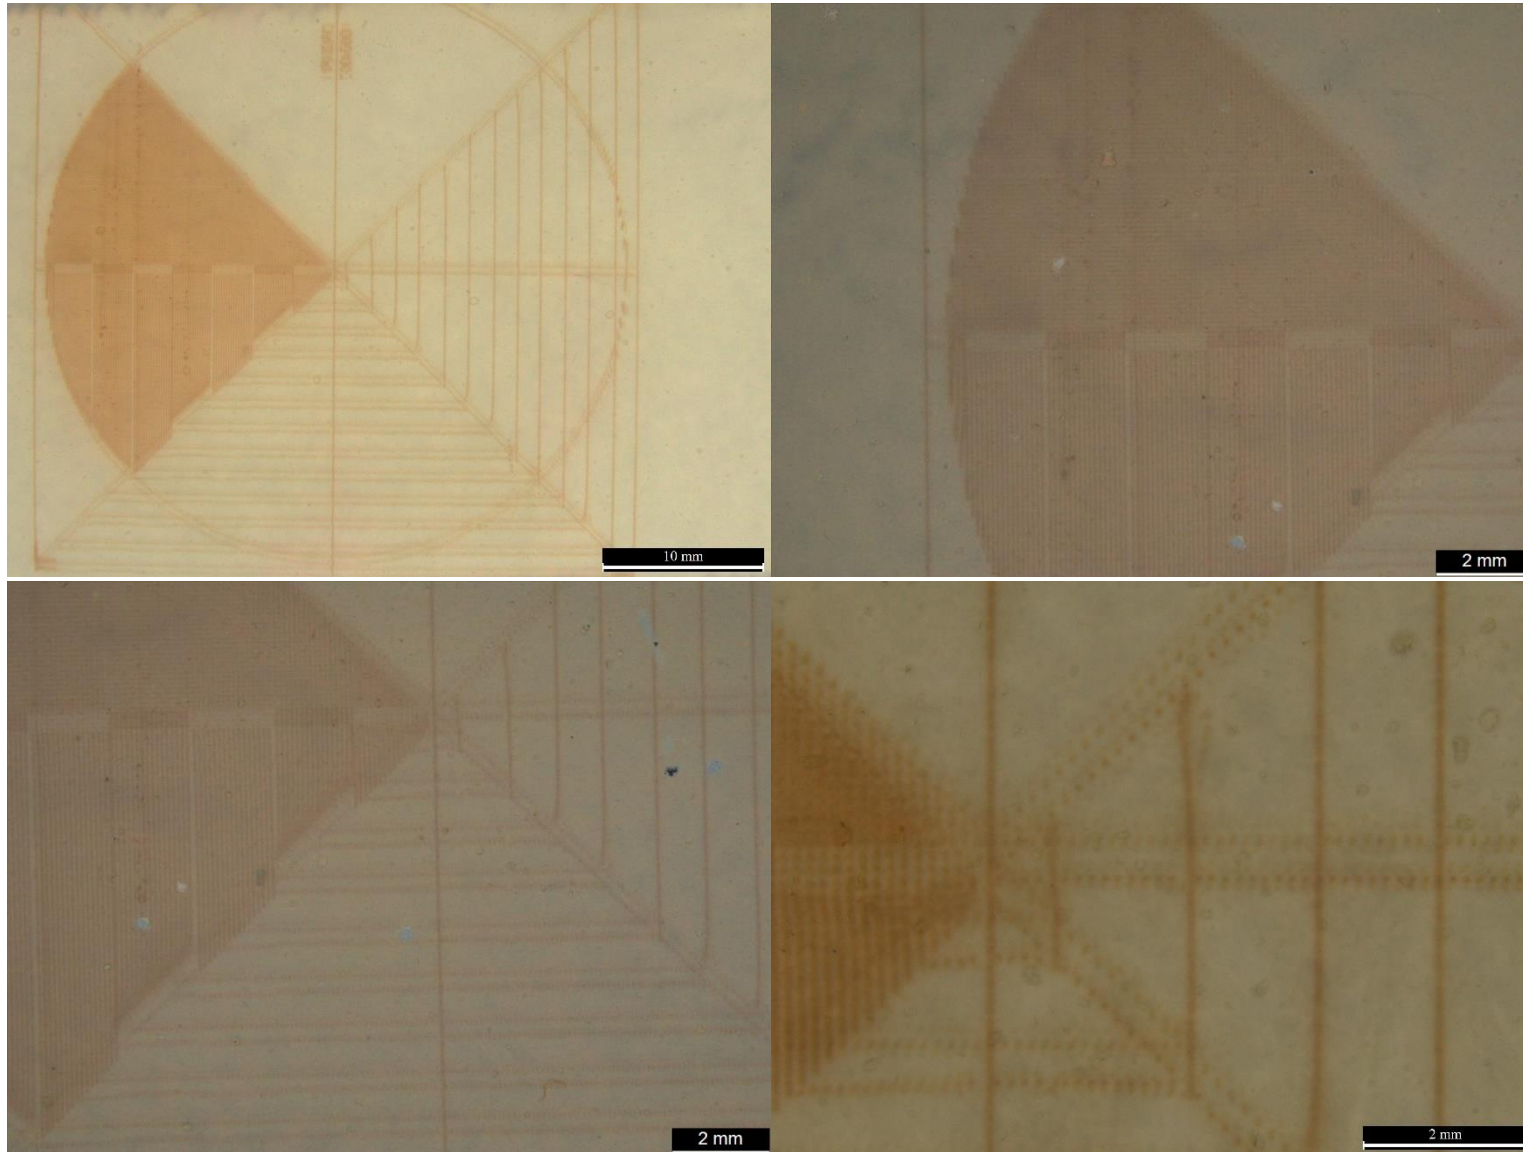

**Figure S 3** A complex pattern shown in several areas and magnifications.

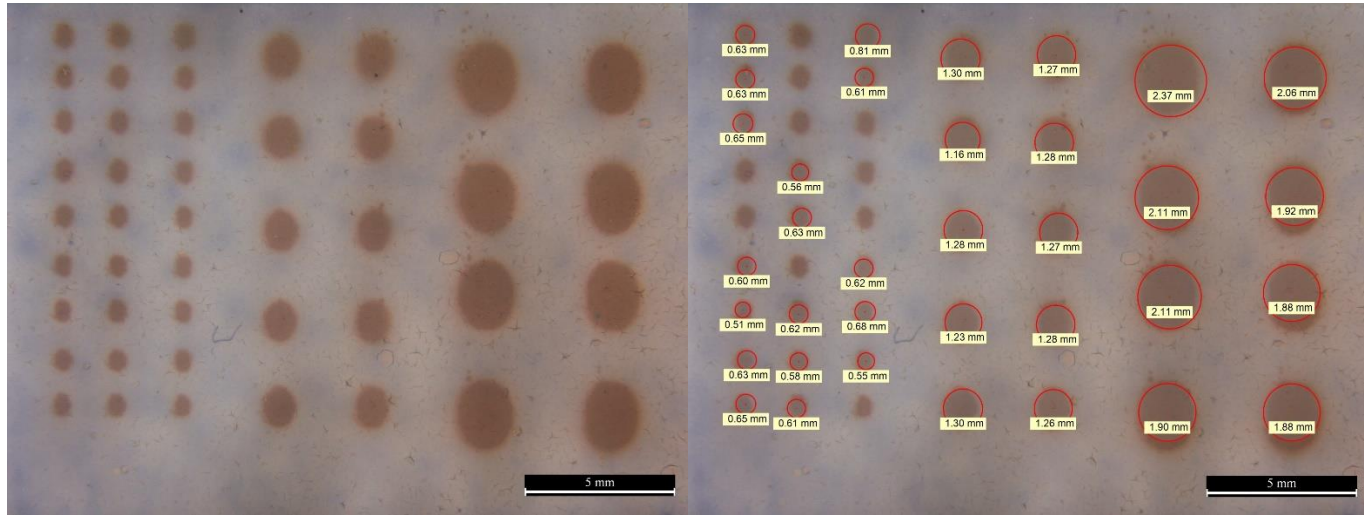

**Figure S 4** A series of printed dots of varying sizes. The image at right is identical but has several of the dots measured.

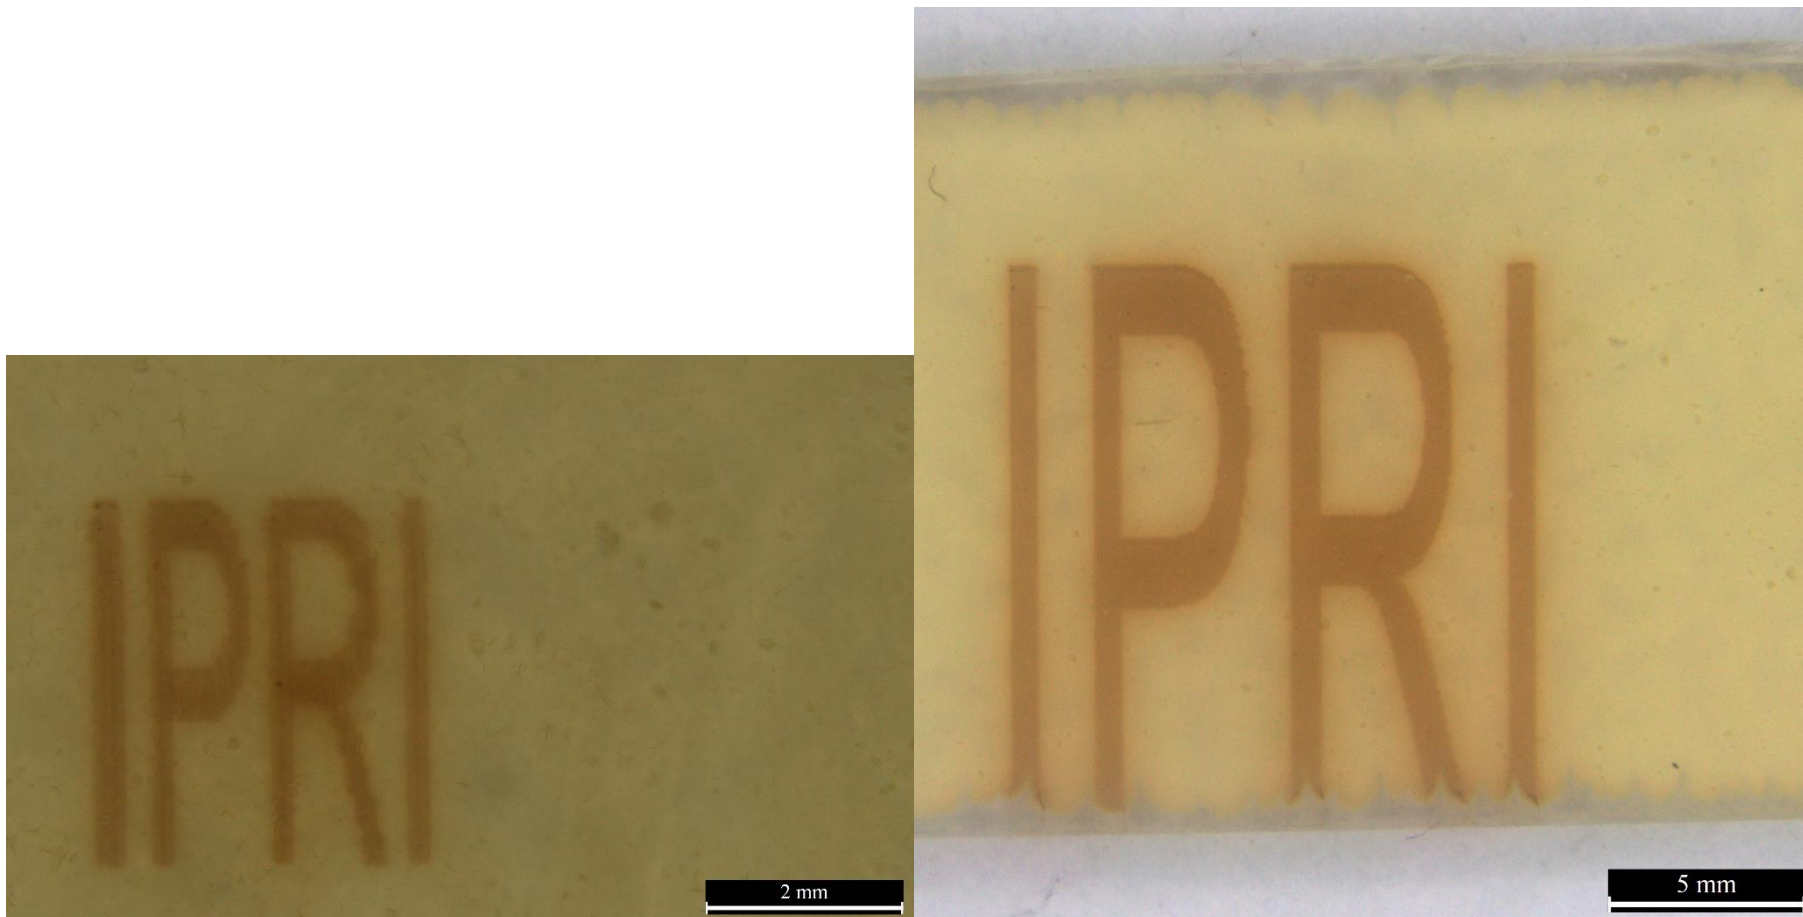

**Figure S 5** Two sizes of printing IPRI. The acronym stands for the Intelligent Polymer Research Institute.

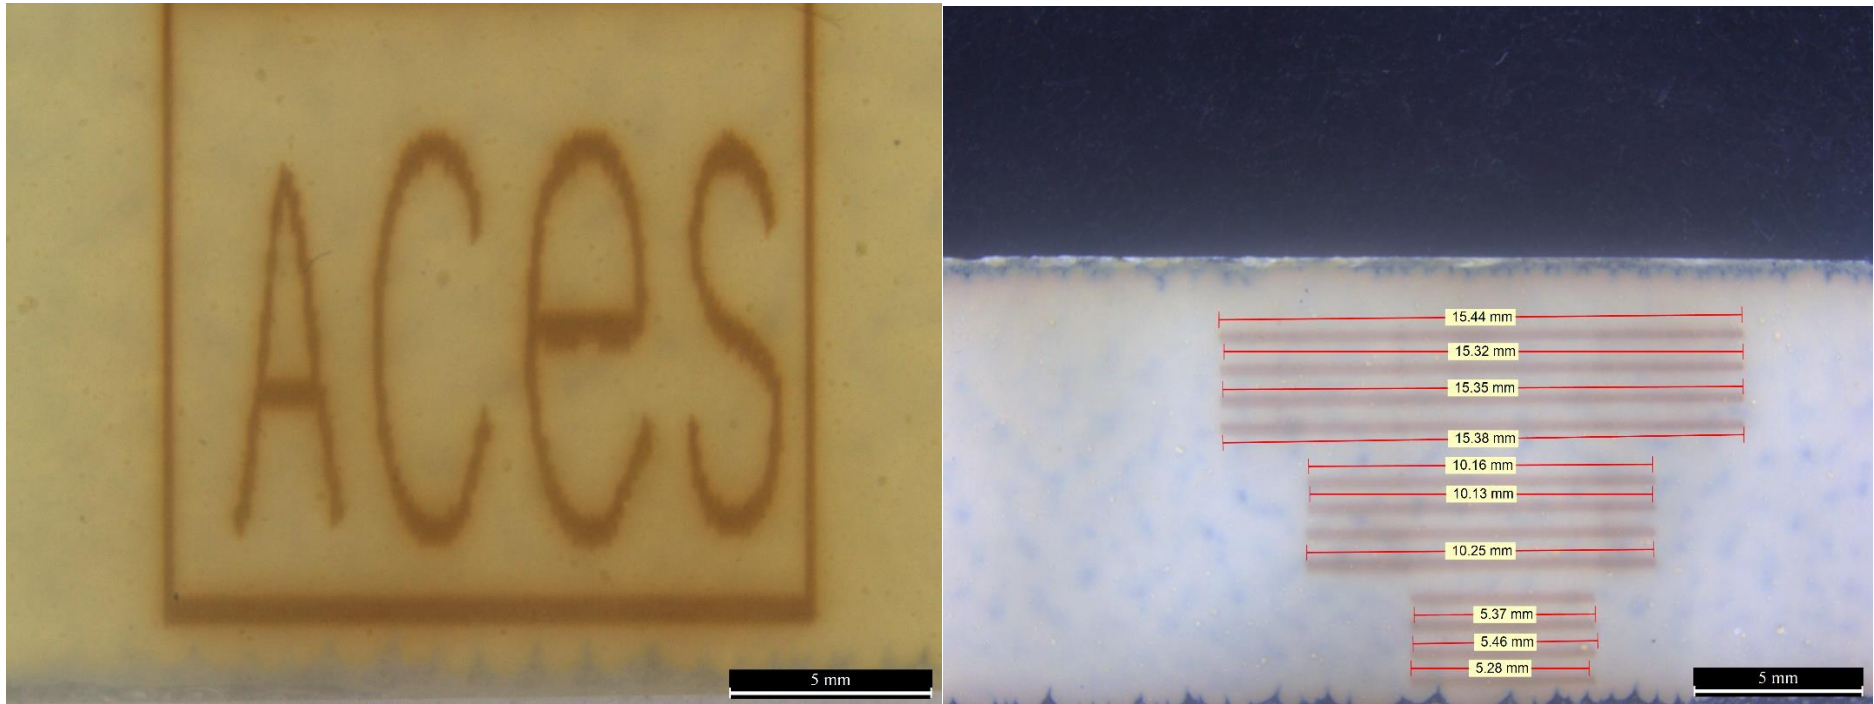

**Figure S 6** The acronym ACES (ARC Centre of Excellence in Electromaterials Science) and a series of printed lines.

## 5 SEM-EDS area scans of films

This series of scans analysed all the elements were analysed. The signals of glass were removed from all subsequent spectra.

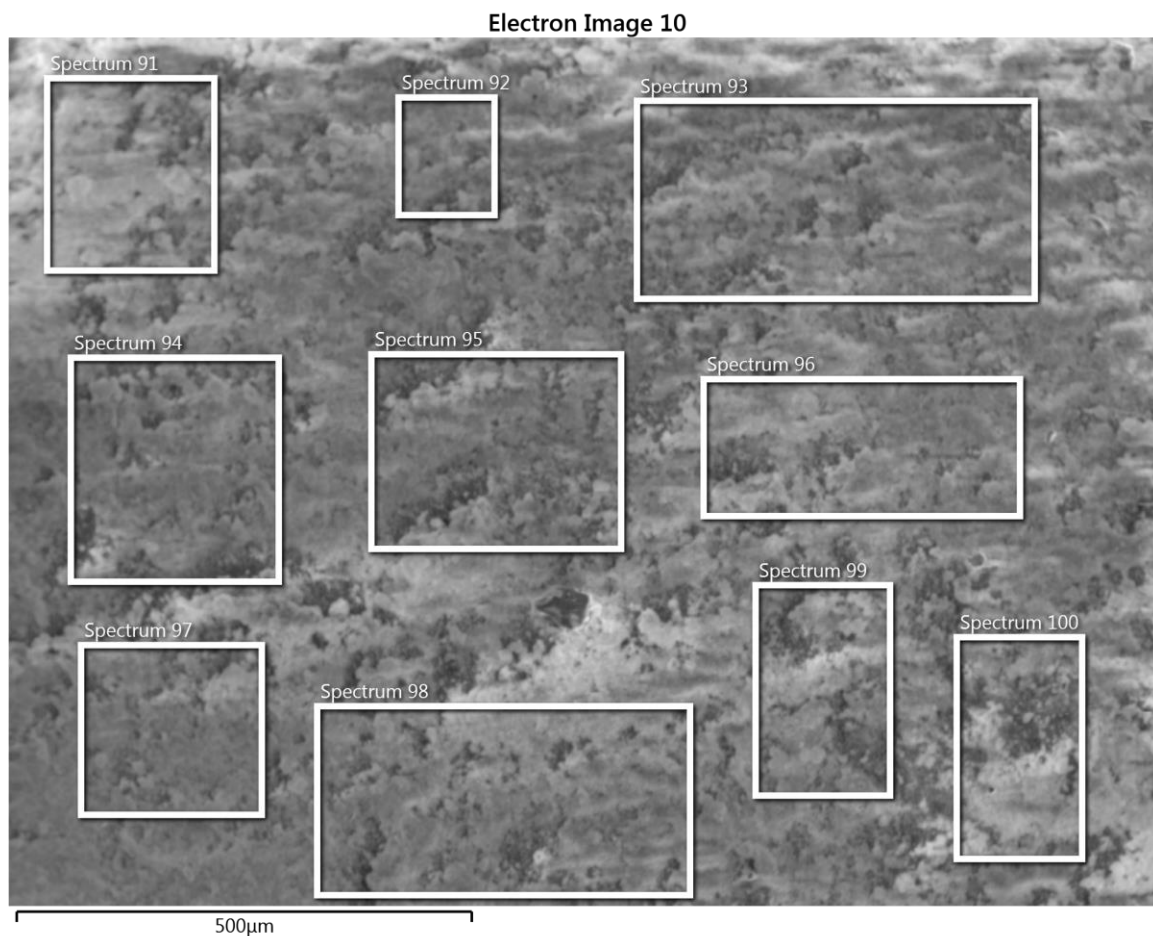

Figure S 7

Table S 1 Elemental analyses obtained from SEM-EDS scans of a representative film of UiO-66-NH<sub>2</sub>.

| Spectrum Label | Spectrum 100 | Spectrum 91 | Spectrum 92 | Spectrum 93 | Spectrum 94 | Spectrum 95 | Spectrum 96 | Spectrum 97 | Spectrum 98 | Spectrum 99 |
|----------------|--------------|-------------|-------------|-------------|-------------|-------------|-------------|-------------|-------------|-------------|
| C              | 39.33        | 41.96       | 40.05       | 42.29       | 37.11       | 37.70       | 39.08       | 40.51       | 42.08       | 40.64       |
| O              | 28.80        | 28.15       | 28.49       | 27.81       | 29.76       | 29.79       | 29.20       | 28.37       | 28.15       | 28.78       |
| Na             | 2.77         | 1.87        | 1.45        | 1.80        | 2.39        | 2.36        | 1.87        | 2.43        | 1.96        | 2.52        |
| Mg             | 0.82         | 0.51        | 0.47        | 0.53        | 0.68        | 0.69        | 0.54        | 0.72        | 0.57        | 0.76        |
| Al             | 0.28         | 0.20        | 0.17        |             | 0.24        | 0.23        | 0.19        |             | 0.20        | 0.19        |
| Si             | 12.39        | 8.97        | 7.79        | 8.94        | 10.88       | 10.67       | 9.03        | 11.31       | 9.37        | 11.56       |
| K              | 0.13         | 0.10        |             | 0.08        |             |             |             | 0.11        | 0.10        | 0.11        |
| Ca             | 1.94         | 1.37        | 1.32        | 1.35        | 1.76        | 1.66        | 1.38        | 1.84        | 1.47        | 1.77        |
| Br             |              |             |             | 0.45        |             |             |             | 0.45        |             |             |
| Zr             | 13.53        | 16.88       | 20.24       | 16.75       | 17.19       | 16.91       | 18.71       | 14.26       | 16.11       | 13.67       |
| Total          | 100.00       | 100.00      | 100.00      | 100.00      | 100.00      | 100.00      | 100.00      | 100.00      | 100.00      | 100.00      |

| Statistics         | C     | O     | Na   | Mg   | Al   | Si    | K    | Ca   | Br   | Zr    |
|--------------------|-------|-------|------|------|------|-------|------|------|------|-------|
| Max                | 42.29 | 29.79 | 2.77 | 0.82 | 0.28 | 12.39 | 0.13 | 1.94 | 0.45 | 20.24 |
| Min                | 37.11 | 27.81 | 1.45 | 0.47 | 0.17 | 7.79  | 0.08 | 1.32 | 0.45 | 13.53 |
| Average            | 40.07 | 28.73 | 2.14 | 0.63 |      | 10.09 |      | 1.59 |      | 16.43 |
| Standard Deviation | 1.79  | 0.68  | 0.41 | 0.12 |      | 1.47  |      | 0.23 |      | 2.15  |



## 5.1 UiO-66-NH<sub>2</sub>

This scan is UiO-66-NH<sub>2</sub> film with elements of glass removed from the analyses.

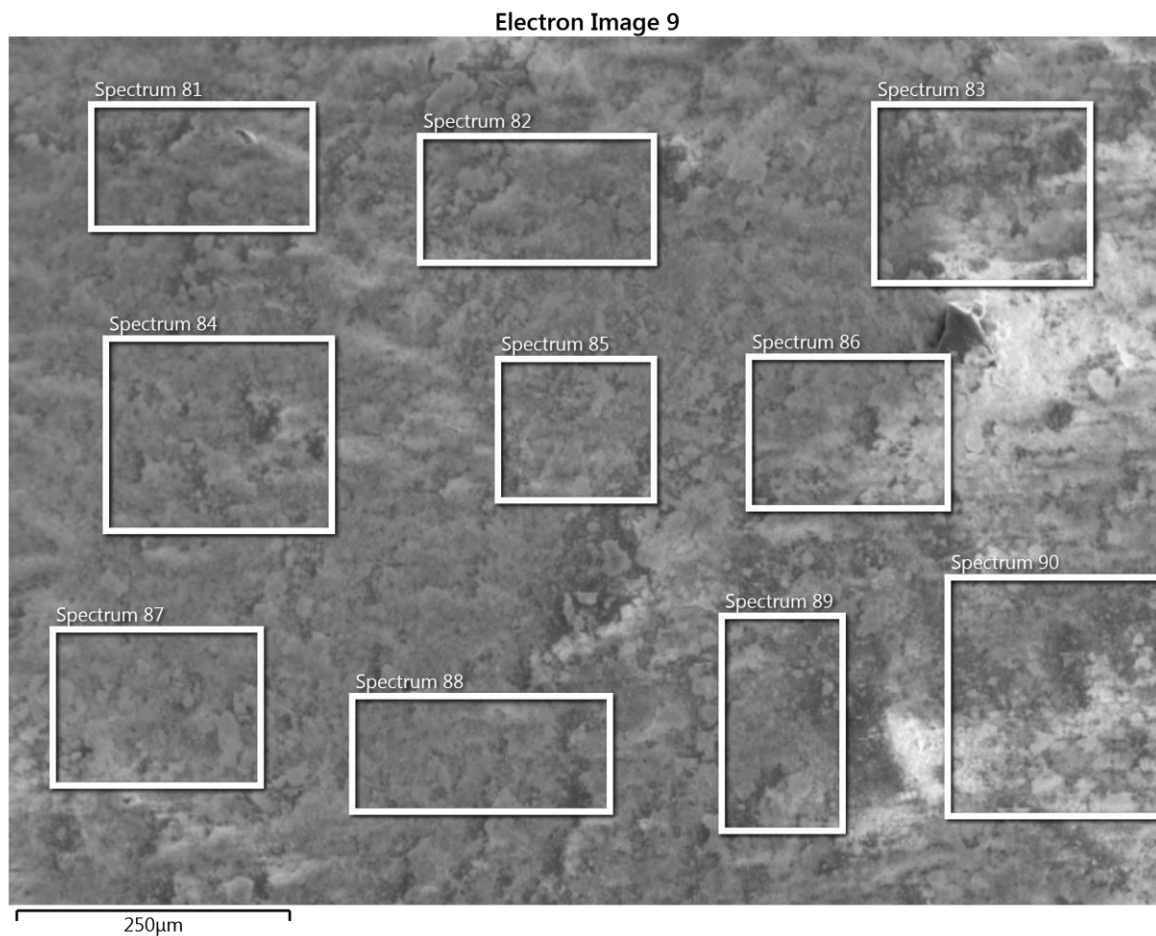

**Figure S 8**

**Table S 2** Elemental analyses obtained from SEM-EDS scans of a representative film of UiO-66-NH<sub>2</sub>.

| Spectrum Label | Spectrum 90 | Spectrum 81 | Spectrum 82 | Spectrum 83 | Spectrum 84 | Spectrum 85 | Spectrum 86 | Spectrum 87 | Spectrum 88 | Spectrum 89 |
|----------------|-------------|-------------|-------------|-------------|-------------|-------------|-------------|-------------|-------------|-------------|
| C              | 37.69       | 39.34       | 40.08       | 37.30       | 39.42       | 38.64       | 40.51       | 39.53       | 39.07       | 38.82       |
| O              | 40.29       | 36.59       | 34.71       | 40.25       | 36.43       | 37.83       | 33.76       | 36.24       | 37.02       | 37.75       |
| Zr             | 22.02       | 24.07       | 25.21       | 22.46       | 24.15       | 23.54       | 25.73       | 24.23       | 23.92       | 23.43       |
| Total          | 100.00      | 100.00      | 100.00      | 100.00      | 100.00      | 100.00      | 100.00      | 100.00      | 100.00      | 100.00      |

| Statistics         | C     | O     | Zr    |
|--------------------|-------|-------|-------|
| Max                | 40.51 | 40.29 | 25.73 |
| Min                | 37.30 | 33.76 | 22.02 |
| Average            | 39.04 | 37.09 | 23.87 |
| Standard Deviation | 0.99  | 2.09  | 1.12  |

## 5.2 UiO-66-NH=CHFc printed at ink temperature 25 °C; time before analysis 1 day.

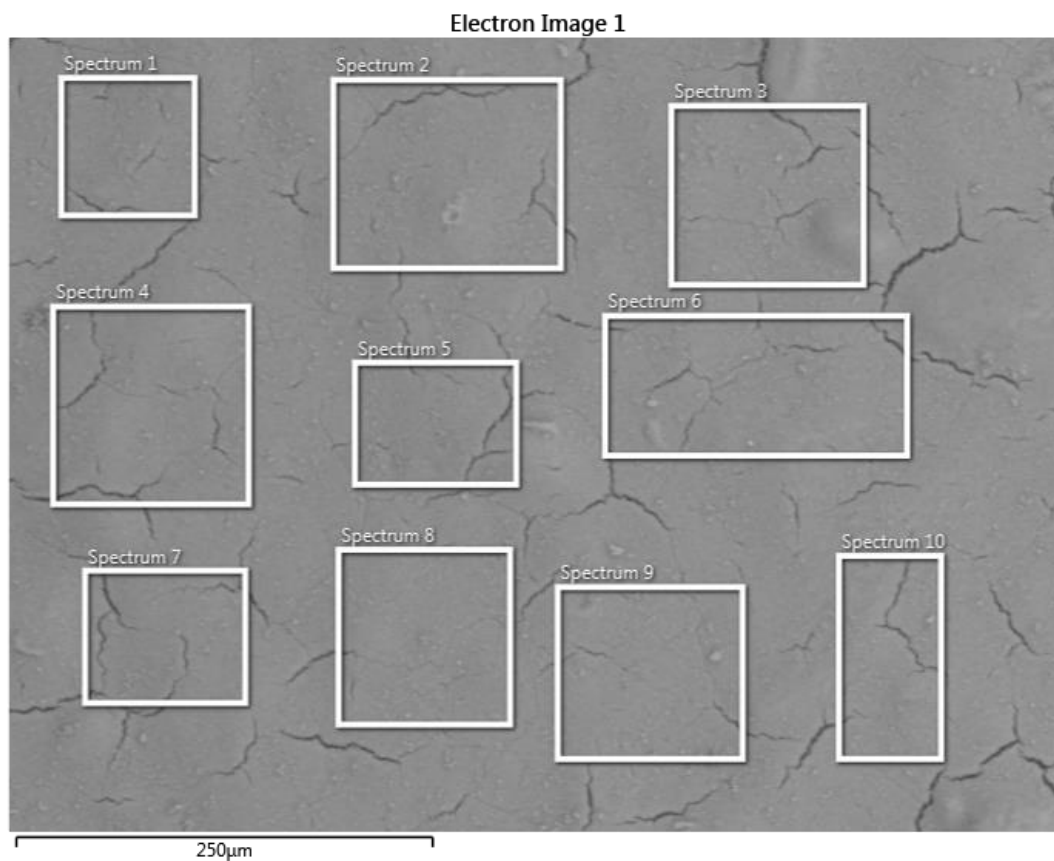

**Figure S 9**

**Table S 3** Elemental EDS vales for the sections examined in the film shown in Figure S9.

| Spectrum Label | Spectrum 1 | Spectrum 2 | Spectrum 3 | Spectrum 4 | Spectrum 5 | Spectrum 6 | Spectrum 7 | Spectrum 8 | Spectrum 9 | Spectrum 10 |
|----------------|------------|------------|------------|------------|------------|------------|------------|------------|------------|-------------|
| C              | 46.18      | 46.41      | 46.29      | 46.38      | 46.69      | 46.26      | 46.12      | 46.24      | 46.41      | 46.74       |
| O              | 25.50      | 25.06      | 25.40      | 25.19      | 25.84      | 25.50      | 25.46      | 25.36      | 25.12      | 24.85       |
| Si             | 0.32       | 0.25       | 0.24       | 0.37       | 0.27       | 0.23       | 0.41       | 0.31       | 0.26       | 0.28        |
| Cl             | 1.28       | 1.32       | 1.29       | 1.29       | 1.24       | 1.29       | 1.26       | 1.26       | 1.24       | 1.29        |
| Ca             |            |            |            | 0.11       |            |            |            |            |            |             |
| Fe             | 4.26       | 4.42       | 4.35       | 4.10       | 4.07       | 4.15       | 4.15       | 4.30       | 4.39       | 4.26        |
| Zr             | 22.46      | 22.55      | 22.43      | 22.55      | 21.88      | 22.57      | 22.61      | 22.55      | 22.58      | 22.58       |
| Total          | 100.00     | 100.00     | 100.00     | 100.00     | 100.00     | 100.00     | 100.00     | 100.00     | 100.00     | 100.00      |

| Statistics         | C     | O     | Si   | Cl   | Ca   | Fe   | Zr    |
|--------------------|-------|-------|------|------|------|------|-------|
| Max                | 46.74 | 25.84 | 0.41 | 1.32 | 0.11 | 4.42 | 22.61 |
| Min                | 46.12 | 24.85 | 0.23 | 1.24 | 0.11 | 4.07 | 21.88 |
| Average            | 46.37 | 25.33 | 0.29 | 1.28 |      | 4.24 | 22.48 |
| Standard Deviation | 0.21  | 0.28  | 0.06 | 0.03 |      | 0.12 | 0.22  |

### 5.3 UiO-66-NH=CHFc printed at ink temperature 25 °C; time before analysis 2 days.



**Figure S 10**

**Table S 4** Elemental EDS vales for the sections examined in the film in Figure S10.

| Spectrum Label | Spectrum 10 | Spectrum 1 | Spectrum 2 | Spectrum 3 | Spectrum 4 | Spectrum 5 | Spectrum 6 | Spectrum 7 | Spectrum 8 | Spectrum 9 |
|----------------|-------------|------------|------------|------------|------------|------------|------------|------------|------------|------------|
| C              | 45.11       | 44.62      | 44.84      | 44.74      | 44.60      | 45.11      | 44.72      | 44.65      | 44.66      | 44.93      |
| O              | 26.12       | 26.78      | 26.30      | 26.64      | 26.73      | 27.12      | 26.74      | 26.72      | 26.62      | 26.30      |
| Fe             | 4.55        | 4.54       | 4.71       | 4.64       | 4.39       | 4.34       | 4.42       | 4.42       | 4.58       | 4.66       |
| Zr             | 24.22       | 24.07      | 24.14      | 23.98      | 24.28      | 23.43      | 24.13      | 24.21      | 24.15      | 24.10      |
| Total          | 100.00      | 100.00     | 100.00     | 100.00     | 100.00     | 100.00     | 100.00     | 100.00     | 100.00     | 100.00     |

| Statistics         | C     | O     | Fe   | Zr    |
|--------------------|-------|-------|------|-------|
| Max                | 45.11 | 27.12 | 4.71 | 24.28 |
| Min                | 44.60 | 26.12 | 4.34 | 23.43 |
| Average            | 44.80 | 26.61 | 4.52 | 24.07 |
| Standard Deviation | 0.19  | 0.29  | 0.13 | 0.24  |

#### 5.4 UiO-66-NH=CHFc printed at ink temperature 70 °C; time before analysis 1 day.

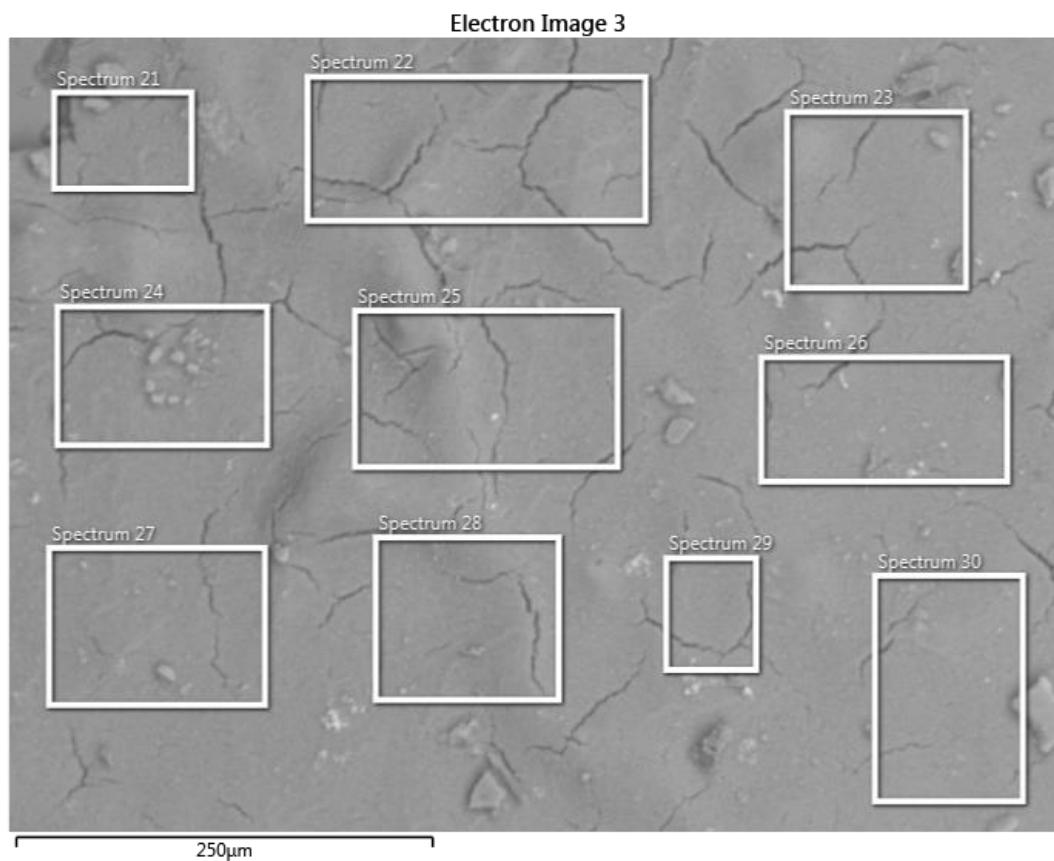

Figure S 11

Table S 5 Elemental EDS vales for the sections examined in the film in Figure S11.

| Spectrum Label | Spectrum 21 | Spectrum 22 | Spectrum 23 | Spectrum 24 | Spectrum 25 | Spectrum 26 | Spectrum 27 | Spectrum 28 | Spectrum 29 | Spectrum 30 |
|----------------|-------------|-------------|-------------|-------------|-------------|-------------|-------------|-------------|-------------|-------------|
| C              | 44.33       | 45.45       | 45.07       | 45.88       | 45.78       | 45.40       | 46.24       | 46.08       | 46.02       | 46.19       |
| O              | 30.62       | 27.51       | 27.33       | 27.07       | 26.71       | 27.26       | 26.64       | 26.72       | 26.38       | 26.13       |
| Fe             | 4.66        | 5.08        | 5.28        | 5.04        | 5.36        | 5.25        | 5.33        | 5.28        | 5.39        | 5.34        |
| Zr             | 20.40       | 21.96       | 22.31       | 22.02       | 22.15       | 22.09       | 21.79       | 21.92       | 22.21       | 22.34       |
| Total          | 100.00      | 100.00      | 100.00      | 100.00      | 100.00      | 100.00      | 100.00      | 100.00      | 100.00      | 100.00      |

| Statistics         | C     | O     | Fe   | Zr    |
|--------------------|-------|-------|------|-------|
| Max                | 46.24 | 30.62 | 5.39 | 22.34 |
| Min                | 44.33 | 26.13 | 4.66 | 20.40 |
| Average            | 45.64 | 27.23 | 5.20 | 21.92 |
| Standard Deviation | 0.60  | 1.27  | 0.22 | 0.56  |

## 6 SEM-EDS analyses of film cross sections

6.1 UiO-66-NH=CHFc printed at ink temperature 25 °C; time before analysis 1 day.

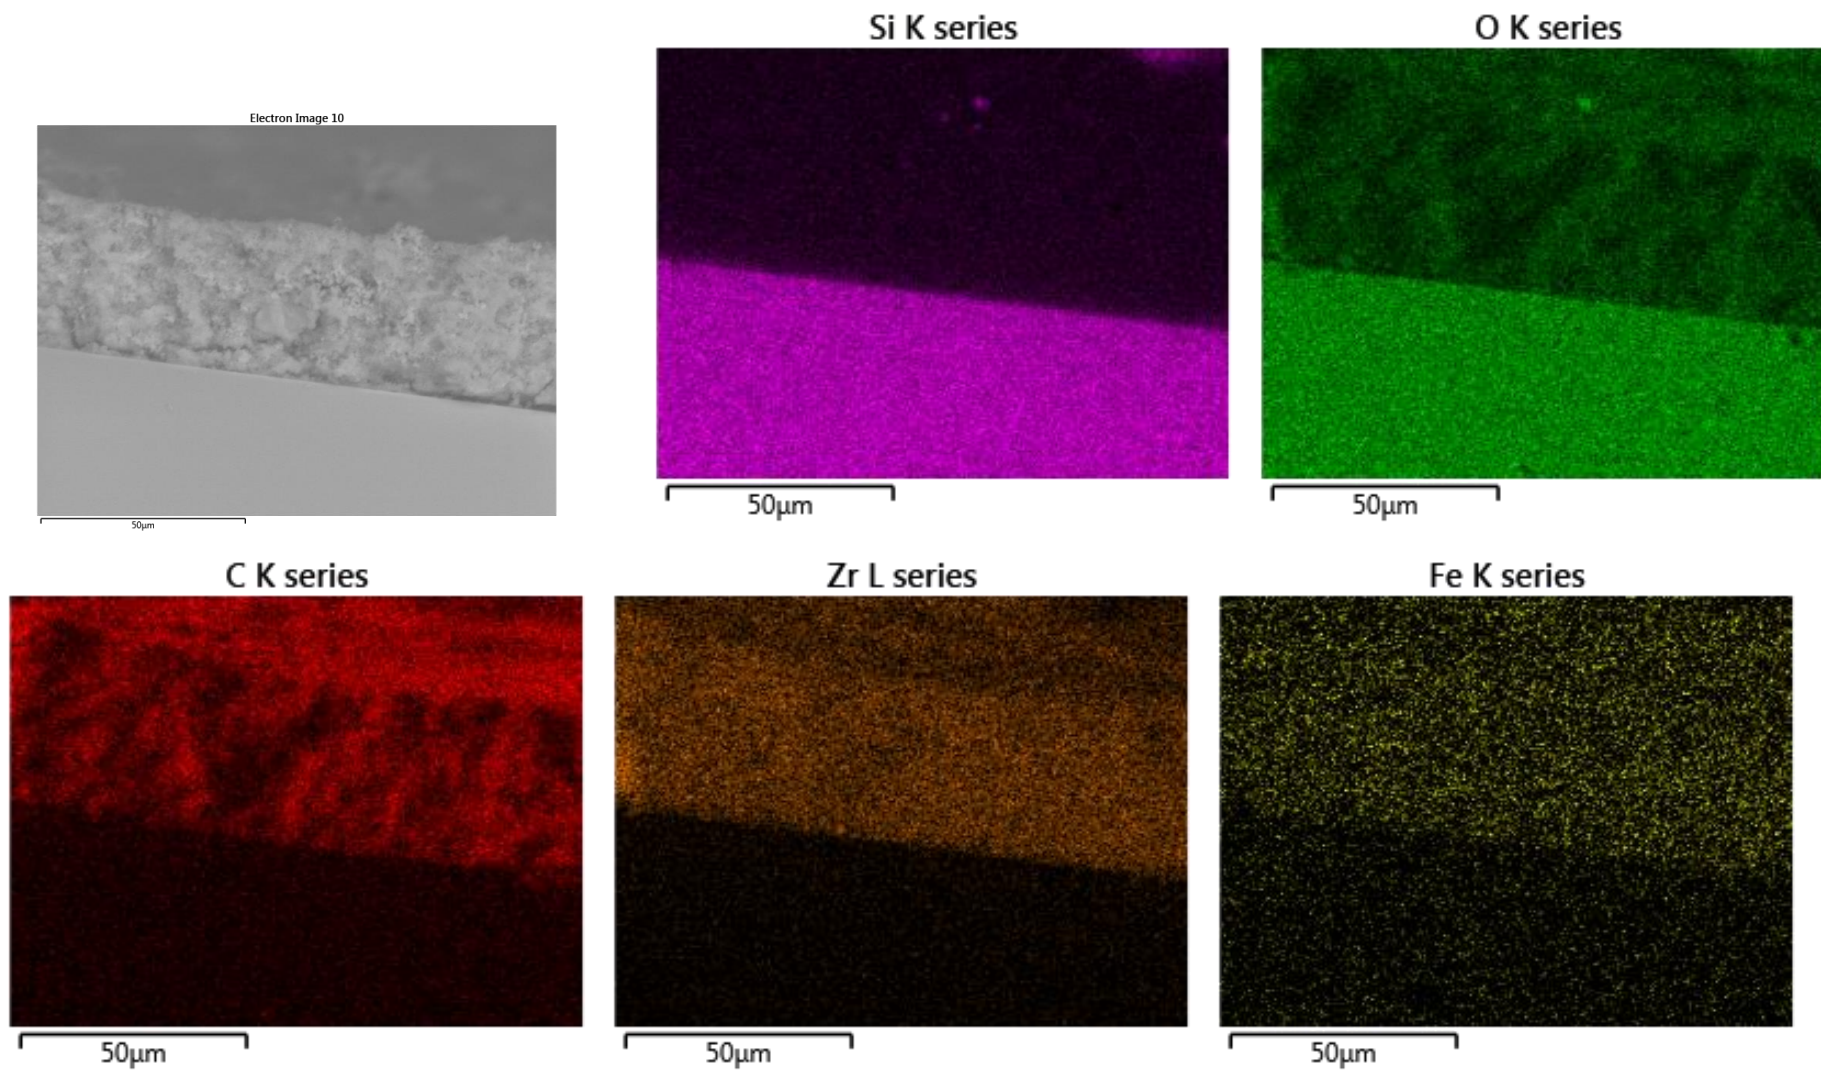

Figure S 12

6.2 UiO-66-NH=CHFc printed at ink temperature 70 °C; time before analysis 0 day.

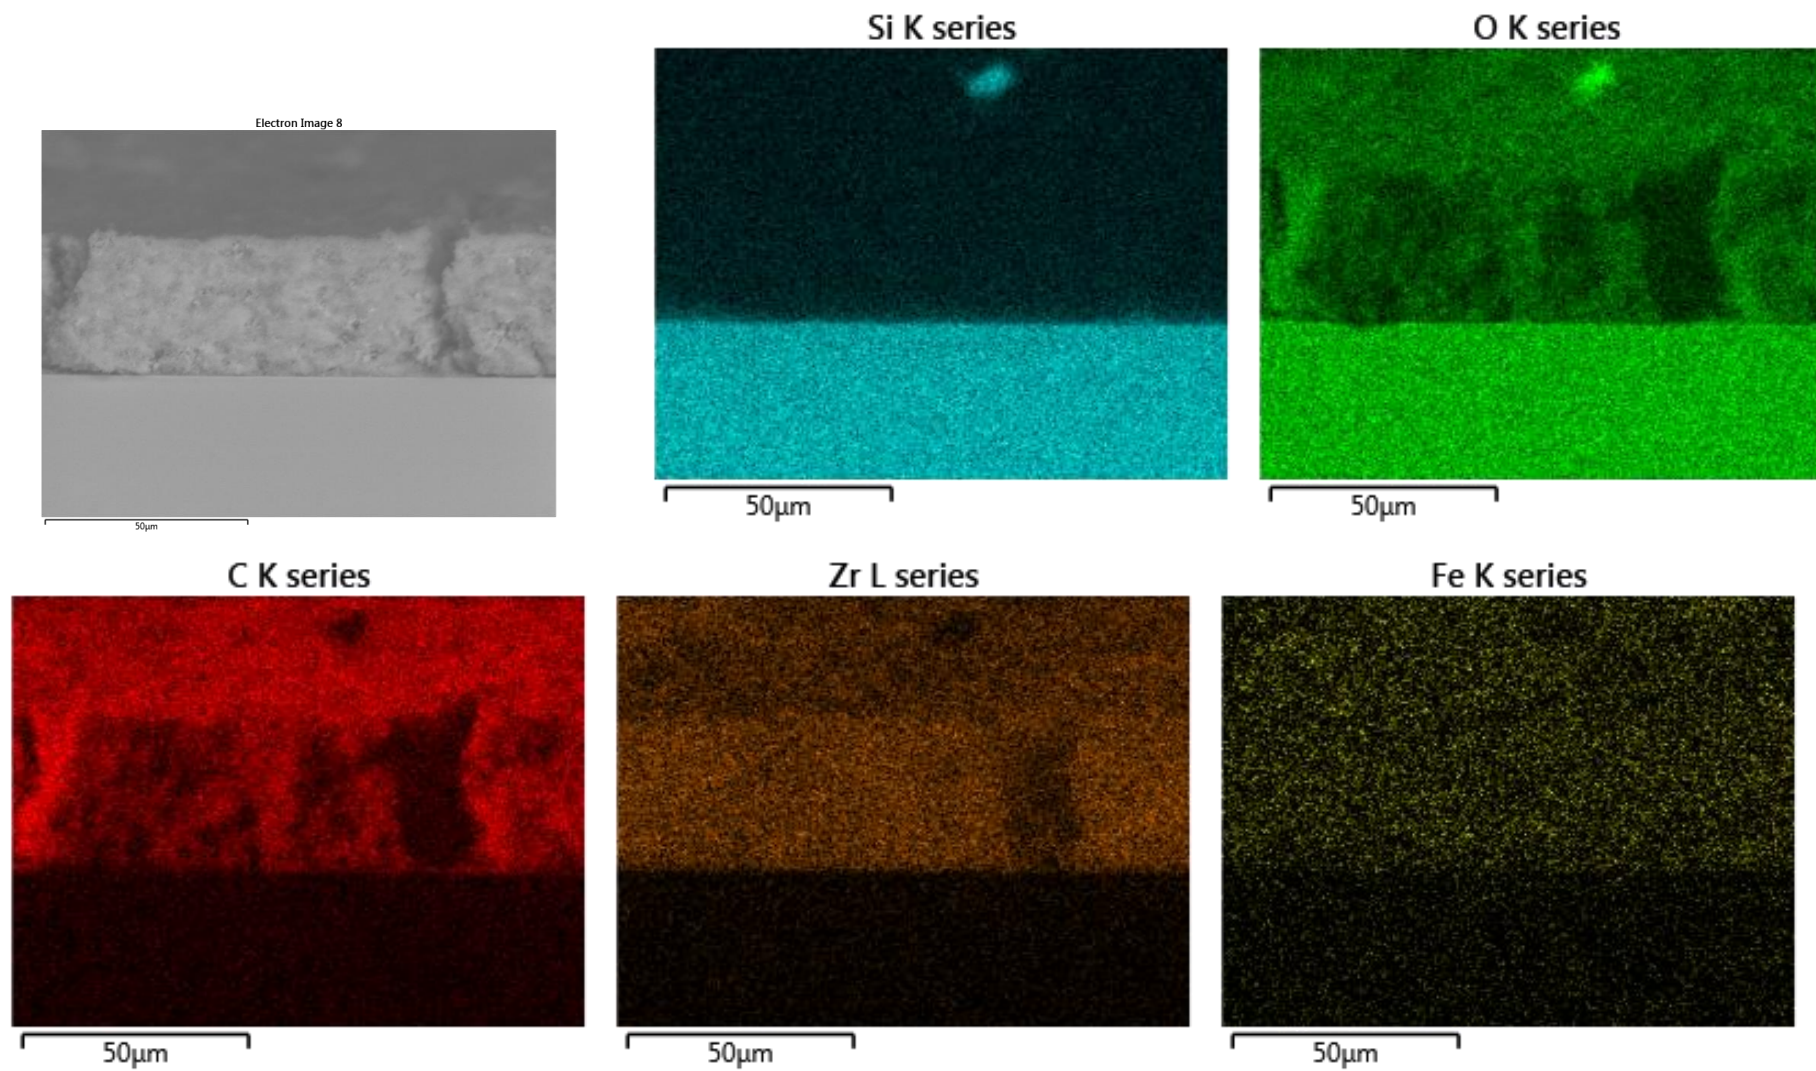

Figure S 13

6.3 UiO-66-NH=CHFc printed at ink temperature 70 °C; time before analysis 1 day.

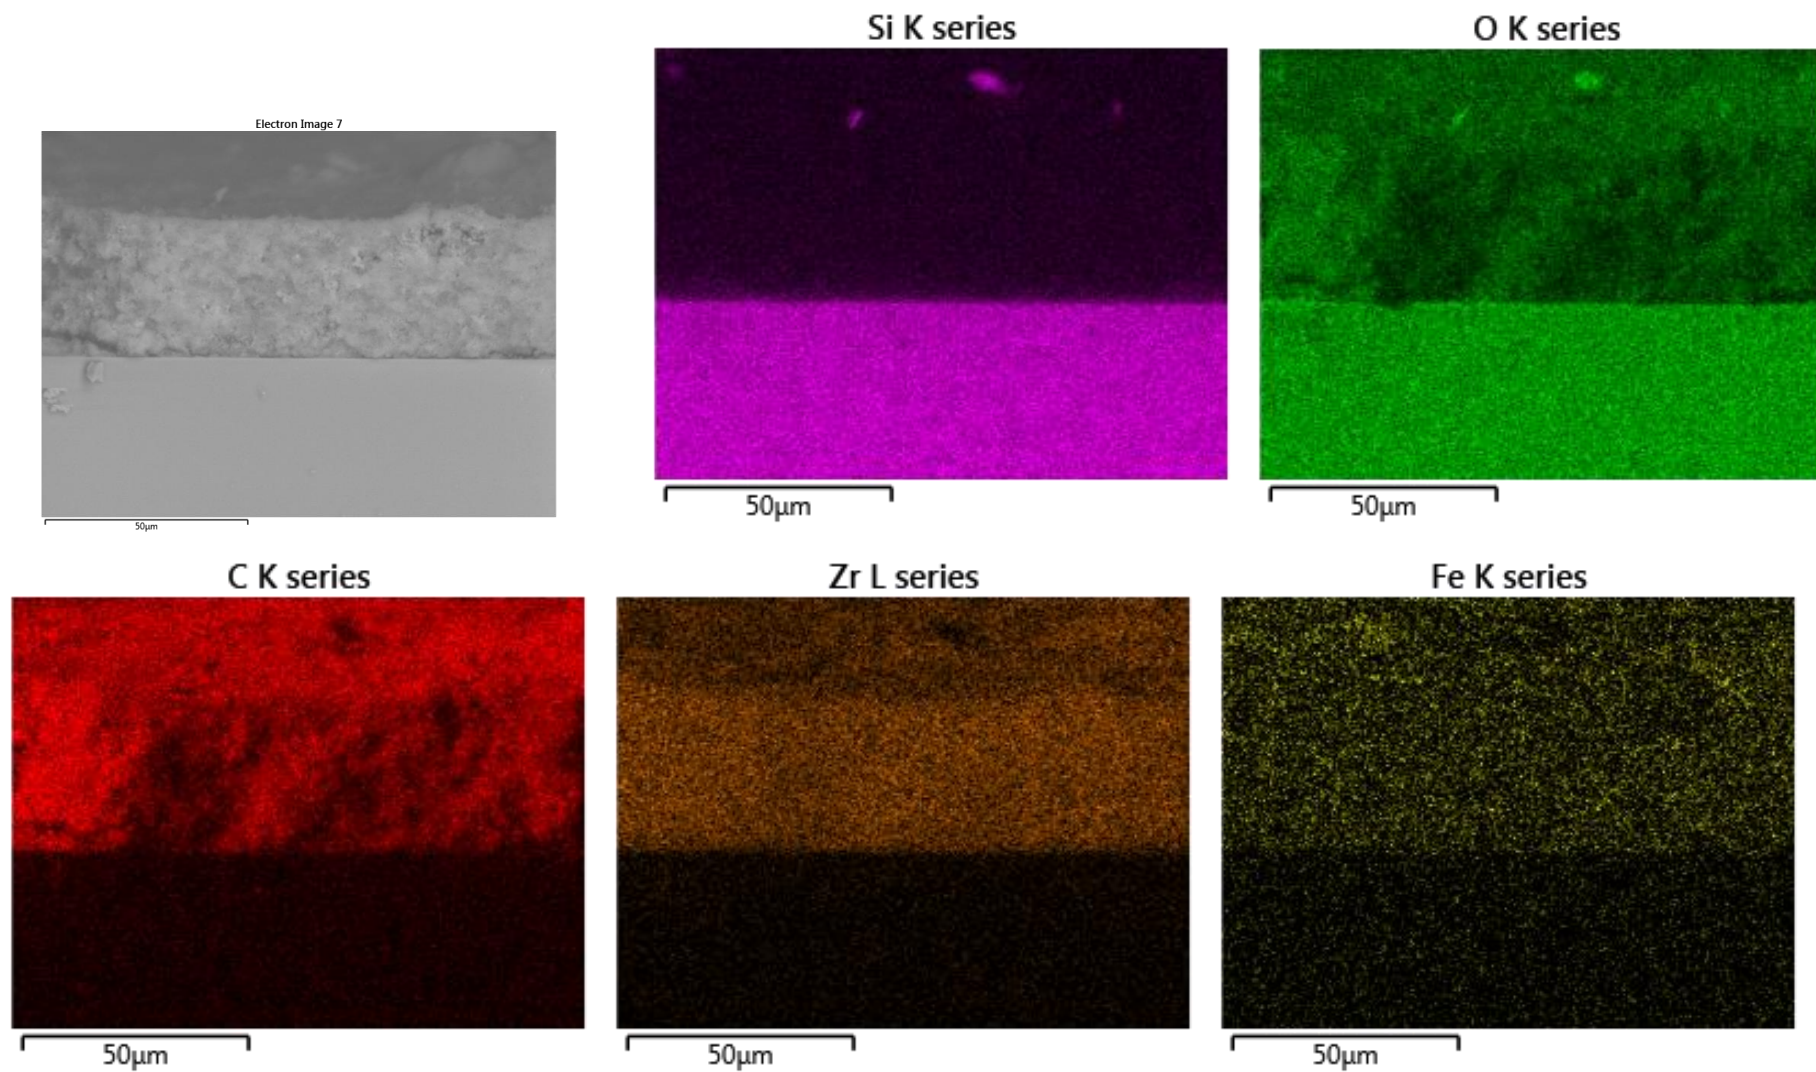

Figure S 14

## Inductively Coupled Plasma-Mass Spectrometry

The ratio of Fe:Zr in the samples was determined by ICP-MS in triplicate. The conversion was based on this ratio understanding a 1:1 ratio of Zr to linkers from the formula  $Zr_6O_4(OH)_4(\text{linkers})_6$ . The linkers are  $O_2C-C_6H_3NH_2-CO_2$  (bdc-NH<sub>2</sub>) or  $O_2C-C_6H_3N=CHFc-CO_2$  (bdc-N=CHFc)

**Table S 6** ICP-MS values for analysis of UiO-66-N=CHFc(*p*-45) (lab code PSM-Lab) and UiO-66-N=CHFc(*f*-8) (lab code PrintFC).

|             | Fe-1 57 (ppb) | Zr 90 (ppb)   | Conversion | Formula                                                           |
|-------------|---------------|---------------|------------|-------------------------------------------------------------------|
| PSM-Lab-1-1 | 62756606.141  | 140630386.308 | 0.4462521  | $Zr_6O_4(OH)_4(\text{bdc-NH}_2)_{3.3}(\text{bdc-N=CHFc})_{2.7}$   |
| PSM-Lab-1-2 | 78296385.626  | 172182529.721 | 0.454729   | As above                                                          |
| PSM-Lab-1-3 | 67464193.743  | 149352810.233 | 0.4517102  | As above                                                          |
| PrintFC-2-1 | 17676075.839  | 220478940.445 | 0.0801713  | $Zr_6O_4(OH)_4(\text{bdc-NH}_2)_{5.52}(\text{bdc-N=CHFc})_{0.48}$ |
| PrintFC-2-2 | 17872196.013  | 241202694.001 | 0.0740962  | As above                                                          |
| PrintFC-2-3 | 15423709.592  | 222980763.006 | 0.0691706  | As above                                                          |



## 7 Thermogravimetric-differential scanning calorimetry

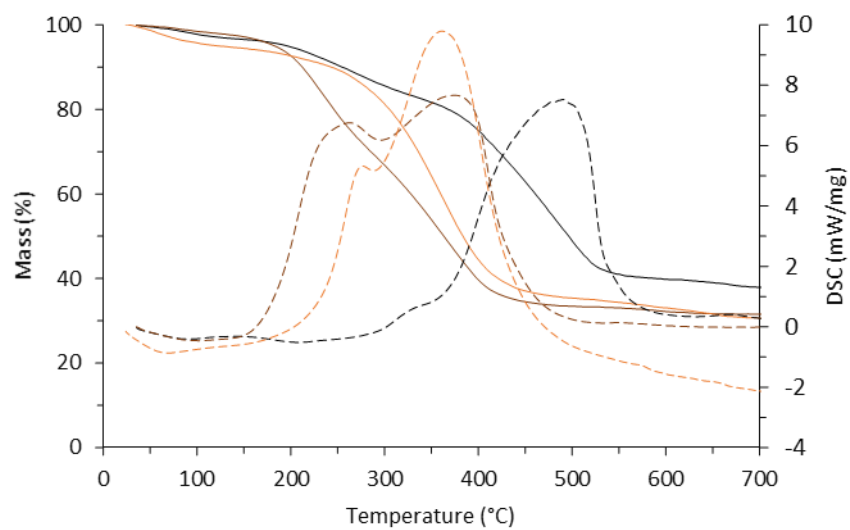

**Figure S 15** TG—DSC traces for UiO-66-NH<sub>2</sub> (black), UiO-66-N=CHFc(*f*-8) (orange) and UiO-66-N=CHFc(*p*-45) (brown); solid lines represent the TGA; dashed lines represent the DSC.

## 8 Gas adsorption

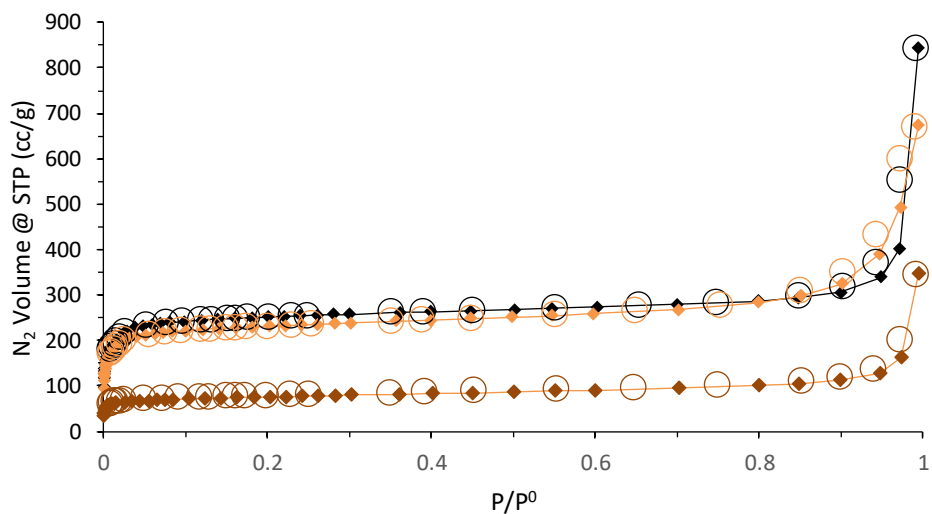

**Figure S 16** N<sub>2</sub> adsorption-desorption isotherms at 77 K of UiO-66-NH<sub>2</sub> (black), UiO-66-N=CHFc(*f*-8) (orange) and UiO-66-N=CHFc(*p*-45) (brown). Adsorption points are shown as filled diamonds and desorption points as unfilled circles. A line on the adsorption legs of the isotherms are shown as a guide for the eye.

**Table S 7** BET Summary table for UiO-66-NH<sub>2</sub> film.

|                                     |                            |                              |
|-------------------------------------|----------------------------|------------------------------|
| <b>Slope =</b>                      |                            | 3.448                        |
| <b>Intercept =</b>                  |                            | 8.64E-03                     |
| <b>Correlation coefficient, r =</b> |                            | 0.999868                     |
| <b>C constant =</b>                 |                            | 400.168                      |
| <b>Surface Area =</b>               |                            | 1007.567 m <sup>2</sup> /g   |
| <b>Relative Pressure (P/Po)</b>     | <b>Volume @ STP (cc/g)</b> | <b>1 / [ W((Po/P) - 1) ]</b> |
| 0.012021                            | 191.4906                   | 0.050841                     |
| 0.015032                            | 199.0806                   | 0.061339                     |
| 0.025186                            | 217.957                    | 0.094848                     |
| 0.027952                            | 221.0841                   | 0.10407                      |
| 0.038613                            | 228.3483                   | 0.14073                      |
| 0.047382                            | 231.7867                   | 0.1717                       |
| 0.058198                            | 234.812                    | 0.21056                      |

**Table S 8** BET Summary table for UiO-66-N=CHFc(*f*-8).

|                                     |                            |                              |
|-------------------------------------|----------------------------|------------------------------|
| <b>Slope =</b>                      |                            | 3.84                         |
| <b>Intercept =</b>                  |                            | 6.99E-03                     |
| <b>Correlation coefficient, r =</b> |                            | 0.999907                     |
| <b>C constant =</b>                 |                            | 550.342                      |
| <b>Surface Area =</b>               |                            | 905.387 m <sup>2</sup> /g    |
| <b>Relative Pressure (P/Po)</b>     | <b>Volume @ STP (cc/g)</b> | <b>1 / [ W((Po/P) - 1) ]</b> |
| 0.012102                            | 180.2883                   | 0.054367                     |
| 0.015092                            | 186.5443                   | 0.065726                     |
| 0.025826                            | 201.3014                   | 0.10537                      |
| 0.03065                             | 204.6244                   | 0.12364                      |
| 0.039666                            | 208.7056                   | 0.15835                      |
| 0.050684                            | 212.0586                   | 0.20145                      |
| 0.061625                            | 214.6594                   | 0.24479                      |

**Table S 9** BET Summary table for UiO-66-N=CHFc(*p*-45).

|                                     |                            |                              |
|-------------------------------------|----------------------------|------------------------------|
| <b>Slope =</b>                      |                            | 12.473                       |
| <b>Intercept =</b>                  |                            | 8.45E-03                     |
| <b>Correlation coefficient, r =</b> |                            | 0.999999                     |
| <b>C constant =</b>                 |                            | 1477.216                     |
| <b>Surface Area =</b>               |                            | 279.030 m <sup>2</sup> /g    |
| <b>Relative Pressure (P/Po)</b>     | <b>Volume @ STP (cc/g)</b> | <b>1 / [ W((Po/P) - 1) ]</b> |
| 0.015054                            | 62.2557                    | 0.19644                      |
| 0.025703                            | 64.13                      | 0.32914                      |
| 0.034163                            | 65.1253                    | 0.43457                      |
| 0.044133                            | 66.1331                    | 0.5586                       |
| 0.054173                            | 67.0332                    | 0.68366                      |
| 0.064407                            | 67.8661                    | 0.81161                      |
| 0.074331                            | 68.6359                    | 0.93609                      |
